# Supplementary material for: Melamine-Modified Graphene Oxide as a Corrosion Resistance Enhancing Additive for Waterborne Epoxy Resin Coatings
Source: MDPI journal article supplement (doi:10.3390/coatings14040488), 2024-04-16
Supplement: s1 [file s1]

# Melamine-Modified Graphene Oxide as a Corrosion Resistance Enhancing Additive for Waterborne Epoxy Resin Coatings

Xin Li <sup>1</sup>, Dongsheng Li <sup>2</sup>, Jie Chen <sup>1</sup>, Dongxia Huo <sup>1</sup>, Xin Gao <sup>1</sup>, Junhui Dong <sup>2</sup>, Yue Yin <sup>1</sup>, Jun Liu <sup>2,\*</sup> and Ding Nan <sup>1,2,\*</sup>

<sup>1</sup> College of Chemistry and Chemical Engineering, Inner Mongolia University, Hohhot 010021, China; lx\_imu@126.com (X.L.); cj\_imu@163.com (J.C.); hdx\_imu@163.com (D.H.); gaoxinxixin@163.com (X.G.); yinyue@imu.edu.cn (Y.Y.)

<sup>2</sup> Inner Mongolia Key Laboratory of Graphite and Graphene for Energy Storage and Coating, School of Materials Science and Engineering, Inner Mongolia University of Technology, Hohhot 010051, China; 20181100167@imut.edu.cn (D.L.); jhdong@imut.edu.cn (J.D.)

\* Correspondence: clxylj@163.com (J.L.); nd@imu.edu.cn (D.N.)

## List

**Figure S1.** FT-IR spectra of GO and MGO.

**Figure S2.** FT-IR spectra of GO and MGO (5:1), and local magnified views

**Figure S3.** Raman spectra of GO and MGO.

**Figure S4.** XRD spectra of GO and MGO.

**Figure S5.** Photograph of coating adhesion test.

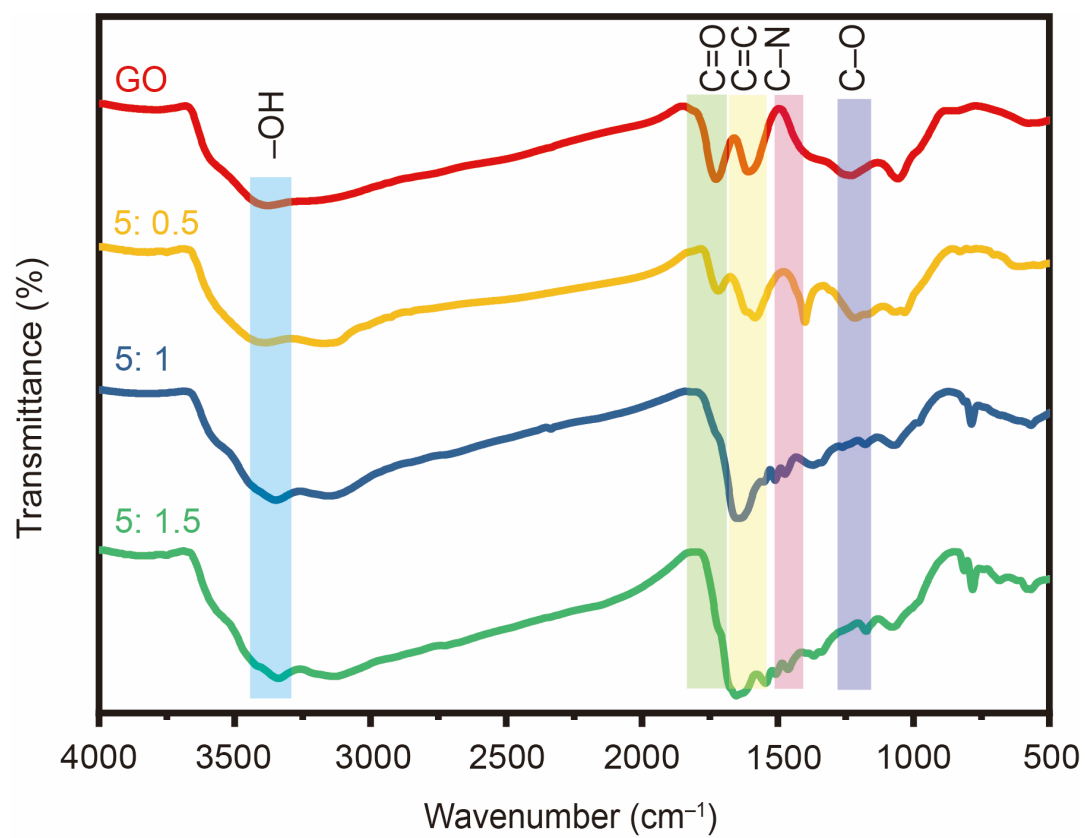

**Figure S1.** FT-IR spectra of GO and MGO.

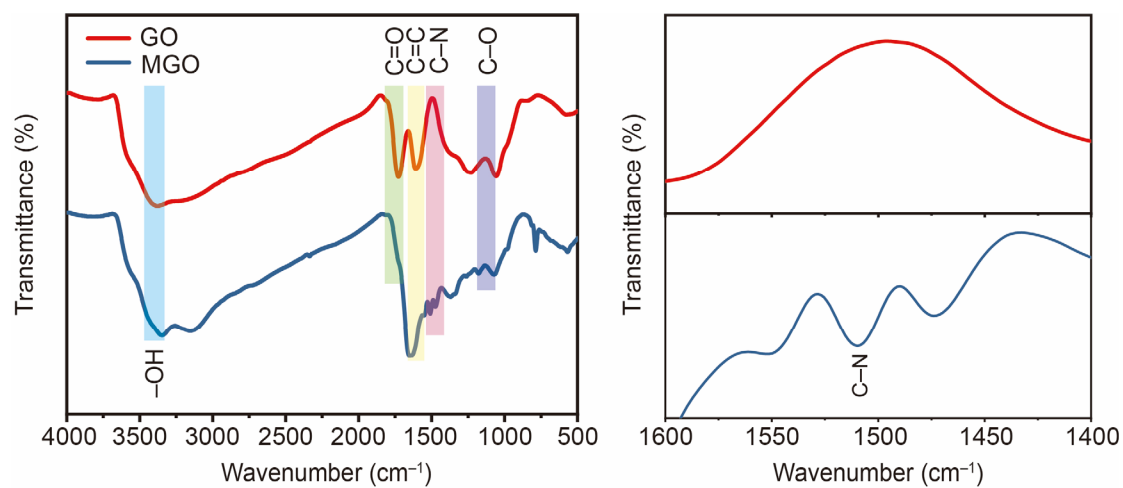

**Figure S2.** FT-IR spectra of GO and MGO (5:1), and local magnified views

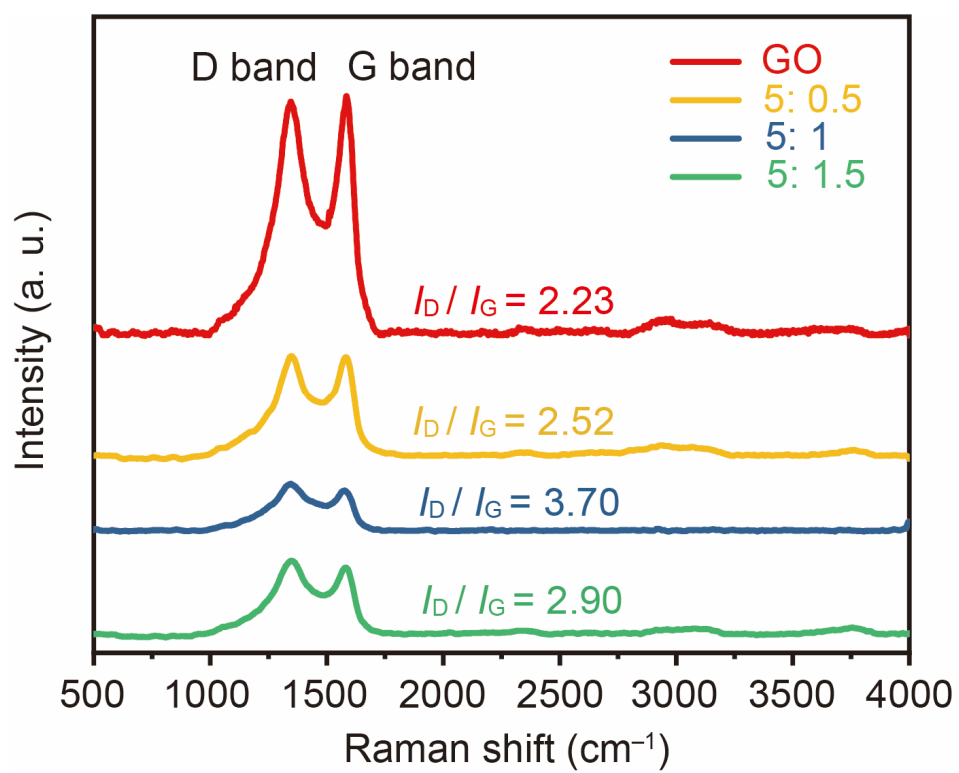

**Figure S3.** Raman spectra of GO and MGO.

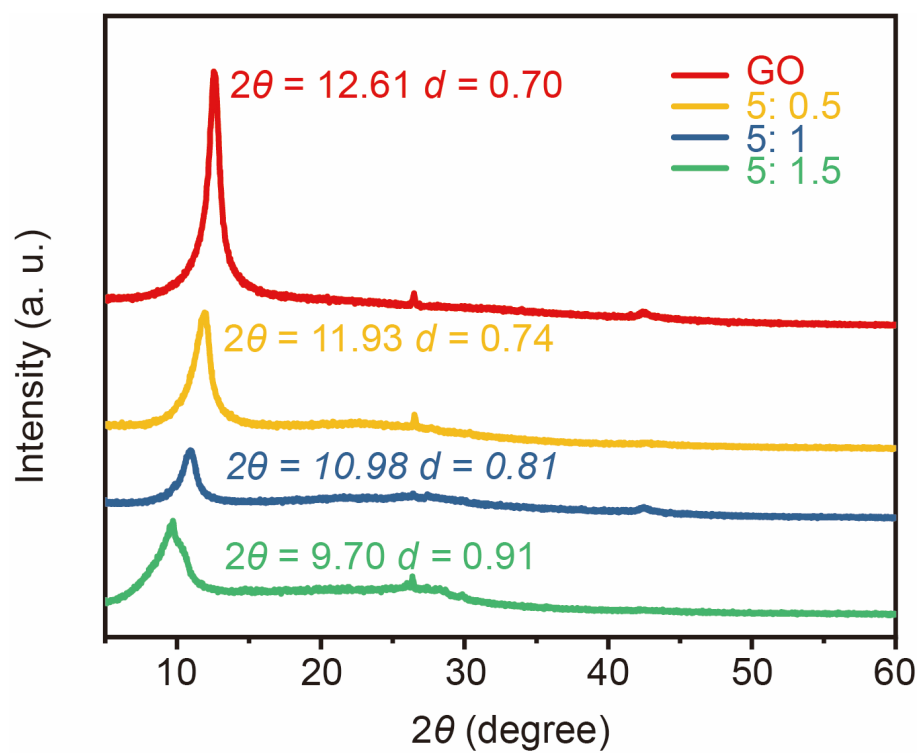

**Figure S4.** XRD spectra of GO and MGO.

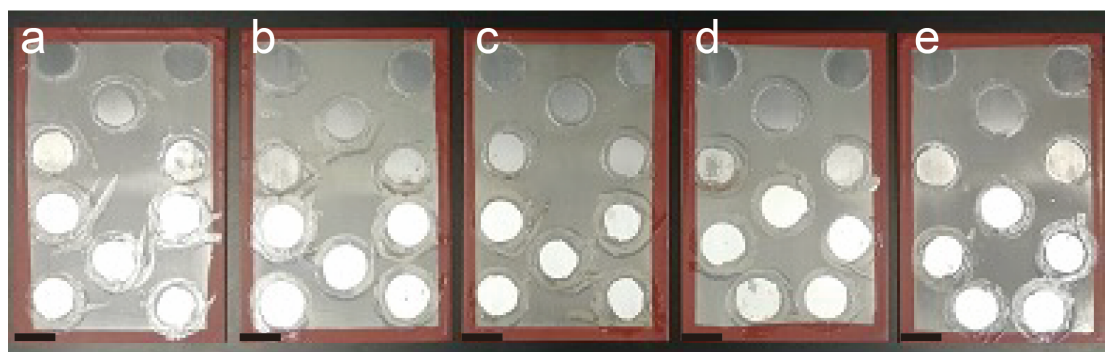

**Figure S5.** Photograph of coating adhesion test. (scale bar: 1 cm)
